# Supplementary material
Source: publisher figshare collection journal article supplement (https://acs.figshare.com/ndownloader/files/4201513)
Supplement: Supplementary file 1 [file 4201513]

# Template-Directed Synthesis of Nets Based upon Octahemioctahedral Cages That Encapsulate Catalytically Active Metalloporphyrins

Zhenjie Zhang, Linping Zhang, Lukasz Wojtas, Mohamed Eddaoudi, and Michael J. Zaworotko\*

| Crystal data and structure refinement for <b>porph@MOM-4</b> |                                                                                                                                                                                                                                                                                                |
|--------------------------------------------------------------|------------------------------------------------------------------------------------------------------------------------------------------------------------------------------------------------------------------------------------------------------------------------------------------------|
| Empirical formula                                            | C <sub>94</sub> H <sub>42</sub> Cl <sub>18.50</sub> Fe <sub>12.50</sub> N <sub>4</sub> O <sub>60</sub><br>8(C <sub>9</sub> H <sub>3</sub> O <sub>6</sub> ), 12Fe, 12(H <sub>2</sub> O), 0.5(C <sub>44</sub> H <sub>36</sub> N <sub>8</sub> Fe <sub>1</sub> Cl <sub>15</sub> ), Cl <sub>6</sub> |
| Formula weight                                               | 3186.77                                                                                                                                                                                                                                                                                        |
| Temperature                                                  | 100(2) K                                                                                                                                                                                                                                                                                       |
| Wavelength                                                   | 1.54178 Å                                                                                                                                                                                                                                                                                      |
| Crystal system, space group                                  | Cubic, Fm-3m                                                                                                                                                                                                                                                                                   |
| Unit cell dimensions                                         | a = 26.5717(17) Å    alpha = 90 deg.<br>b = 26.5717(17) Å    beta = 90 deg.<br>c = 26.5717(17) Å    gamma = 90 deg.                                                                                                                                                                            |
| Volume                                                       | 18761(2) Å <sup>3</sup>                                                                                                                                                                                                                                                                        |
| Z, Calculated density                                        | 4, 1.128 Mg/m <sup>3</sup>                                                                                                                                                                                                                                                                     |
| Absorption coefficient                                       | 9.178 mm <sup>-1</sup>                                                                                                                                                                                                                                                                         |
| Crystal size                                                 | 0.05 x 0.05 x 0.05 mm                                                                                                                                                                                                                                                                          |
| Theta range for data collection                              | 5.52 to 65.26 deg.                                                                                                                                                                                                                                                                             |
| Reflections collected / unique                               | 7378 / 848 [R(int) = 0.0760]                                                                                                                                                                                                                                                                   |
| Completeness to theta = 64.53                                | 97.2 %                                                                                                                                                                                                                                                                                         |
| Data / restraints / parameters                               | 848 / 29 / 87                                                                                                                                                                                                                                                                                  |
| Goodness-of-fit on F <sup>2</sup>                            | 1.028                                                                                                                                                                                                                                                                                          |
| Final R indices [I > 2sigma(I)]                              | R1 = 0.0891, wR2 = 0.2543                                                                                                                                                                                                                                                                      |
| R indices (all data)                                         | R1 = 0.1278, wR2 = 0.2821                                                                                                                                                                                                                                                                      |
| Largest diff. peak and hole                                  | 0.642 and -0.465 e. Å <sup>-3</sup>                                                                                                                                                                                                                                                            |

| Crystal data and structure refinement for <b>porph@MOM-5</b> |                                                                                                                                                                                                                                                  |
|--------------------------------------------------------------|--------------------------------------------------------------------------------------------------------------------------------------------------------------------------------------------------------------------------------------------------|
| Empirical formula                                            | C101.33 H75.50 Cl2.67 Co12.67 N5.33 O61.75<br>8(C <sub>9</sub> H <sub>3</sub> O <sub>6</sub> ), 12Co, 12(H <sub>2</sub> O), 0.66667<br>(C <sub>44</sub> H <sub>36</sub> N <sub>8</sub> Cu <sub>1</sub> Cl <sub>5</sub> ), 1.75(H <sub>2</sub> O) |
| Formula weight                                               | 3196.80                                                                                                                                                                                                                                          |
| Temperature                                                  | 100(2) K                                                                                                                                                                                                                                         |
| Wavelength                                                   | 0.40663 Å                                                                                                                                                                                                                                        |
| Crystal system, space group                                  | Cubic, Fm-3m                                                                                                                                                                                                                                     |
| Unit cell dimensions                                         | a = 26.4292(11) Å    alpha = 90 deg.<br>b = 26.4292(11) Å    beta = 90 deg.<br>c = 26.4292(11) Å    gamma = 90 deg.                                                                                                                              |
| Volume                                                       | 18460.9(13) Å <sup>3</sup>                                                                                                                                                                                                                       |
| Z, Calculated density                                        | 4, 1.150 Mg/m <sup>3</sup>                                                                                                                                                                                                                       |
| Absorption coefficient                                       | 0.233 mm <sup>-1</sup>                                                                                                                                                                                                                           |
| Crystal size                                                 | 0.05 x 0.05 x 0.05 mm                                                                                                                                                                                                                            |
| Theta range for data collection                              | 1.97 to 14.02 deg.                                                                                                                                                                                                                               |
| Reflections collected / unique                               | 34737 / 871 [R(int) = 0.0873]                                                                                                                                                                                                                    |
| Completeness to theta = 64.53                                | 98.6 %                                                                                                                                                                                                                                           |
| Data / restraints / parameters                               | 871 / 29 / 79                                                                                                                                                                                                                                    |
| Goodness-of-fit on F <sup>2</sup>                            | 1.003                                                                                                                                                                                                                                            |
| Final R indices [I > 2sigma(I)]                              | R1 = 0.0815, wR2 = 0.2452                                                                                                                                                                                                                        |
| R indices (all data)                                         | R1 = 0.0997, wR2 = 0.2648                                                                                                                                                                                                                        |
| Largest diff. peak and hole                                  | 0.623 and -0.530 e. Å <sup>-3</sup>                                                                                                                                                                                                              |

| Crystal data and structure refinement for <b>porph@MOM-6</b> |                                                                                                                                                                                                    |
|--------------------------------------------------------------|----------------------------------------------------------------------------------------------------------------------------------------------------------------------------------------------------|
| Empirical formula                                            | C101.33 H72 Cl3.33 Mn12.67 N5.33 O60<br>8(C <sub>9</sub> H <sub>3</sub> O <sub>6</sub> ), 12Mn, 12(H <sub>2</sub> O),<br>0.666(C <sub>44</sub> H <sub>36</sub> N <sub>8</sub> Fe1Cl <sub>5</sub> ) |
| Formula weight                                               | 3138.38                                                                                                                                                                                            |
| Temperature                                                  | 100(2) K                                                                                                                                                                                           |
| Wavelength                                                   | 0.40663 Å                                                                                                                                                                                          |
| Crystal system, space group                                  | Cubic, Fm-3m                                                                                                                                                                                       |
| Unit cell dimensions                                         | a = 26.597(2) Å    alpha = 90 deg.<br>b = 26.597(2) Å    beta = 90 deg.<br>c = 26.597(2) Å    gamma = 90 deg.                                                                                      |
| Volume                                                       | 18816(2) Å <sup>3</sup>                                                                                                                                                                            |
| Z, Calculated density                                        | 4, 1.108 Mg/m <sup>3</sup>                                                                                                                                                                         |
| Absorption coefficient                                       | 0.173 mm <sup>-1</sup>                                                                                                                                                                             |
| Crystal size                                                 | 0.01 x 0.01 x 0.01 mm                                                                                                                                                                              |
| Theta range for data collection                              | 2.28 to 13.05 deg.                                                                                                                                                                                 |
| Reflections collected / unique                               | 17924 / 723 [R(int) = 0.0639]                                                                                                                                                                      |
| Completeness to theta = 64.53                                | 98.0 %                                                                                                                                                                                             |
| Data / restraints / parameters                               | 723 / 29 / 76                                                                                                                                                                                      |
| Goodness-of-fit on F <sup>2</sup>                            | 1.031                                                                                                                                                                                              |
| Final R indices [I > 2sigma(I)]                              | R1 = 0.0925, wR2 = 0.2352                                                                                                                                                                          |
| R indices (all data)                                         | R1 = 0.1187, wR2 = 0.2601                                                                                                                                                                          |
| Largest diff. peak and hole                                  | 0.375 and -0.376 e. Å <sup>-3</sup>                                                                                                                                                                |

| Crystal data and structure refinement for <b>porph@MOM-7</b> |                                                                                                                                                                                                                                                                         |
|--------------------------------------------------------------|-------------------------------------------------------------------------------------------------------------------------------------------------------------------------------------------------------------------------------------------------------------------------|
| Empirical formula                                            | C <sub>72</sub> H <sub>24</sub> Ni <sub>10.71</sub> O <sub>81</sub><br>{[8Ni 5.333(C <sub>9</sub> H <sub>3</sub> O <sub>6</sub> ) 20H <sub>2</sub> O] [2Ni 2.6666(C <sub>9</sub> H <sub>3</sub> O <sub>6</sub> ) 4H <sub>2</sub> O]}.9H <sub>2</sub> O . 0.71Ni 2858.84 |
| Formula weight                                               | 2813.55                                                                                                                                                                                                                                                                 |
| Temperature                                                  | 100(2) K                                                                                                                                                                                                                                                                |
| Wavelength                                                   | 1.54178 Å                                                                                                                                                                                                                                                               |
| Crystal system, space group                                  | Cubic, Fm-3m                                                                                                                                                                                                                                                            |
| Unit cell dimensions                                         | a = 27.478(2) Å    alpha = 90 deg.<br>b = 27.478(2) Å    beta = 90 deg.<br>c = 27.478(2) Å    gamma = 90 deg.                                                                                                                                                           |
| Volume                                                       | 20747(3) Å <sup>3</sup>                                                                                                                                                                                                                                                 |
| Z, Calculated density                                        | 4, 0.901 Mg/m <sup>3</sup>                                                                                                                                                                                                                                              |
| Absorption coefficient                                       | 1.582 mm <sup>-1</sup>                                                                                                                                                                                                                                                  |
| Crystal size                                                 | 0.10 x 0.10 x 0.10 mm                                                                                                                                                                                                                                                   |
| Theta range for data collection                              | 6.44 to 63.58 deg.                                                                                                                                                                                                                                                      |
| Reflections collected / unique                               | 8168 / 888 [R(int) = 0.0923]                                                                                                                                                                                                                                            |
| Completeness to theta = 64.53                                | 96.4 %                                                                                                                                                                                                                                                                  |
| Data / restraints / parameters                               | 888 / 1 / 74                                                                                                                                                                                                                                                            |
| Goodness-of-fit on F <sup>2</sup>                            | 1.091                                                                                                                                                                                                                                                                   |
| Final R indices [I>2sigma(I)]                                | R1 = 0.1075, wR2 = 0.2816                                                                                                                                                                                                                                               |
| R indices (all data)                                         | R1 = 0.1329, wR2 = 0.2972                                                                                                                                                                                                                                               |
| Largest diff. peak and hole                                  | 0.554 and -0.463 e. Å <sup>-3</sup>                                                                                                                                                                                                                                     |

| Crystal data and structure refinement for <b>porph@MOM-9</b> |                                                                                                                                                                                 |
|--------------------------------------------------------------|---------------------------------------------------------------------------------------------------------------------------------------------------------------------------------|
| Empirical formula                                            | C108 H36 O91 Zn18.66<br>12(C <sub>9</sub> H <sub>3</sub> O <sub>6</sub> ), 18Zn, 15(H <sub>2</sub> O), 0.66(C <sub>44</sub> H <sub>36</sub> N <sub>8</sub> Zn1H <sub>2</sub> O) |
| Formula weight                                               | 4009.50                                                                                                                                                                         |
| Temperature                                                  | 100(2) K                                                                                                                                                                        |
| Wavelength                                                   | 0.40663 Å                                                                                                                                                                       |
| Crystal system, space group                                  | Orthorhombic, Cmmm                                                                                                                                                              |
| Unit cell dimensions                                         | a = 19.653(3) Å    alpha = 90 deg.<br>b = 44.127(6) Å    beta = 90 deg.<br>c = 14.543(2) Å    gamma = 90 deg.                                                                   |
| Volume                                                       | 12612(3) Å <sup>3</sup>                                                                                                                                                         |
| Z, Calculated density                                        | 2, 1.056 Mg/m <sup>3</sup>                                                                                                                                                      |
| Absorption coefficient                                       | 0.361 mm <sup>-1</sup>                                                                                                                                                          |
| Crystal size                                                 | 0.10 x 0.08 x 0.08 mm                                                                                                                                                           |
| Theta range for data collection                              | 1.19 to 13.05 deg.                                                                                                                                                              |
| Reflections collected / unique                               | 39524 / 4753 [R(int) = 0.0720]                                                                                                                                                  |
| Completeness to theta = 64.53                                | 95.8 %                                                                                                                                                                          |
| Data / restraints / parameters                               | 4753 / 288 / 284                                                                                                                                                                |
| Goodness-of-fit on F <sup>2</sup>                            | 1.072                                                                                                                                                                           |
| Final R indices [I > 2sigma(I)]                              | R1 = 0.1241, wR2 = 0.3302                                                                                                                                                       |
| R indices (all data)                                         | R1 = 0.1357, wR2 = 0.3413                                                                                                                                                       |
| Largest diff. peak and hole                                  | 1.061 and -1.579e. Å <sup>-3</sup>                                                                                                                                              |

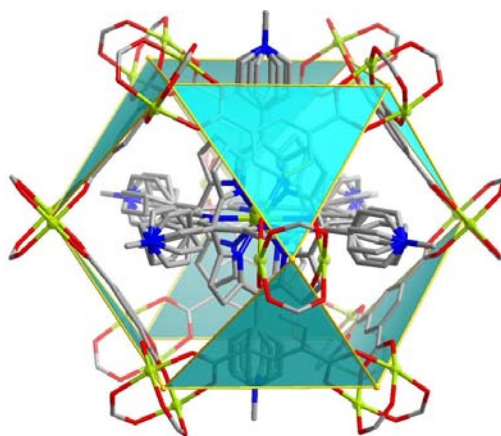

**Figure S1.** A TMPyP molecule appearing in three positions.

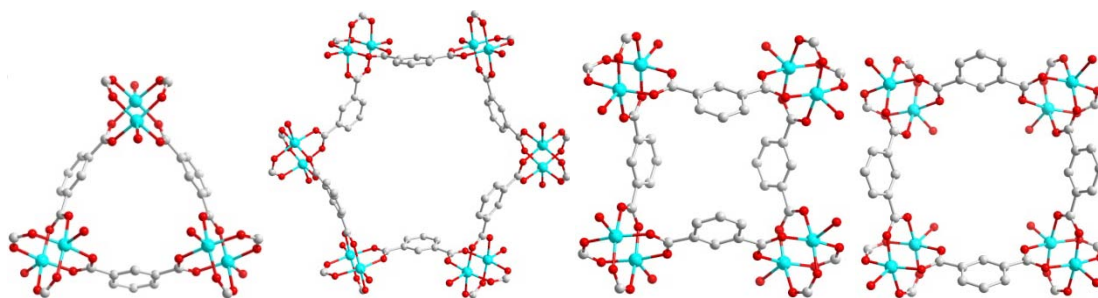

**Figure S2.** (From left to right) Triangle nSBU, hexagon nSBU, 1,3-alternate square nSBU and cone square nSBU.

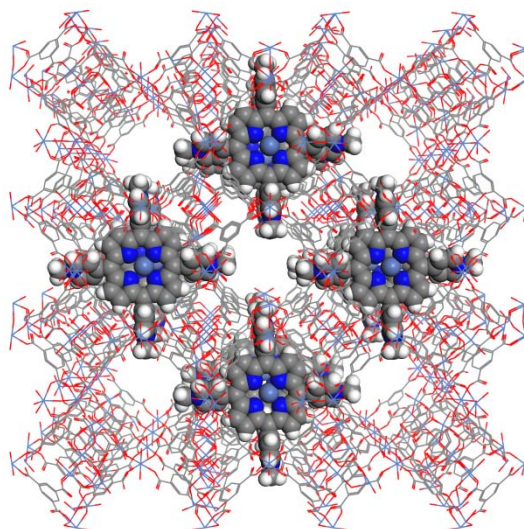

**Figure S3.** Projection of the structure of **porph@MOM-7** along the *a* axis and porphyrins molecules are locating in the octahemioctahedral cages.

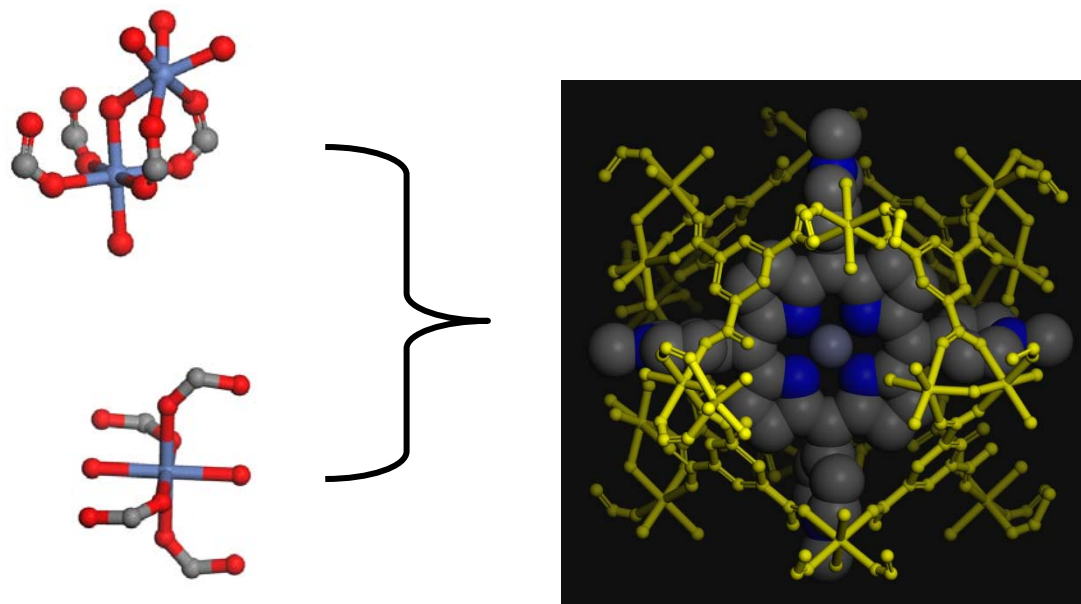

**Figure S4.** An illustration of the cavity in **porph@MOM-7** that contains porphyrin molecules.

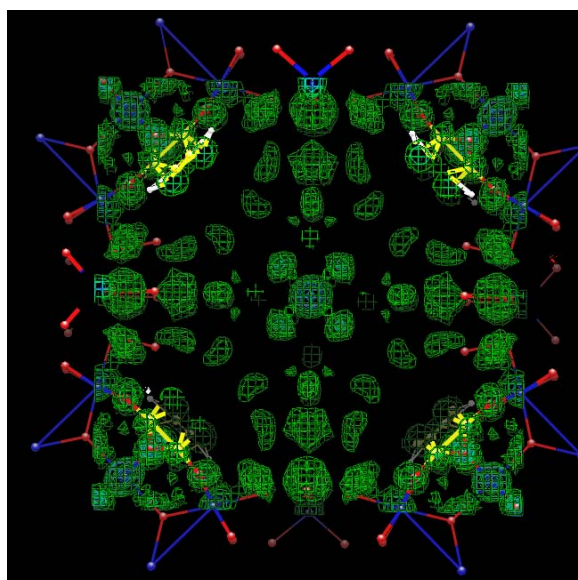

**Figure S5.** Electron density map of  $2F_o - F_c$  at 1-sigma level indicating the position of the porphyrin in the unit cell of **porph@MOM-7**.

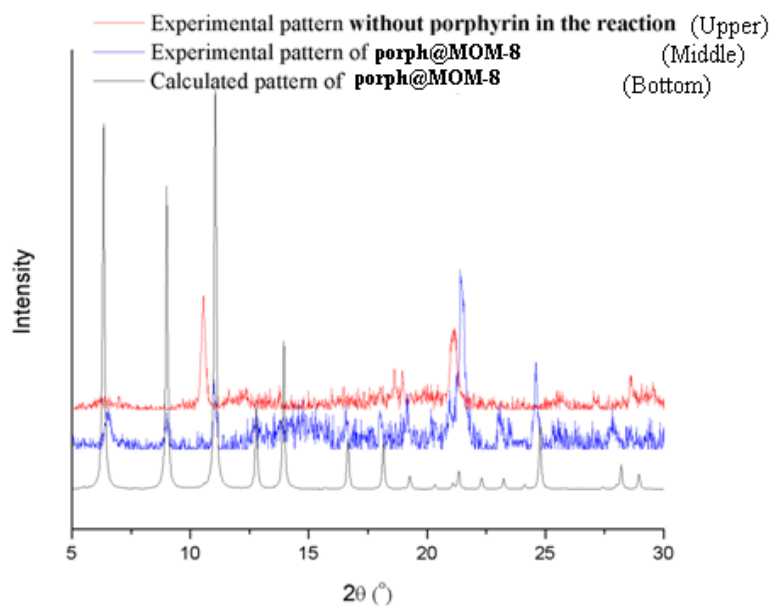

**Figure S6.** Comparison of experimental and calculated (calculated from **porph@MOM-7**) powder x-ray diffraction patterns of **porph@MOM-8** and the product that was obtained without porphyrin in the reaction.

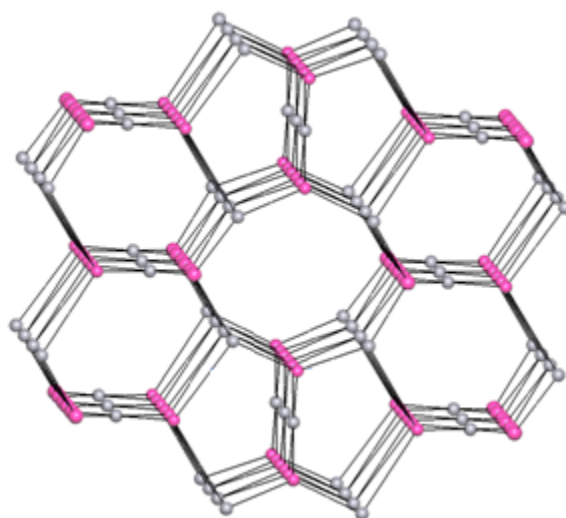

**Figure S7.** The 3,3,3,4,4,6-c net of **porph@MOM-9**.



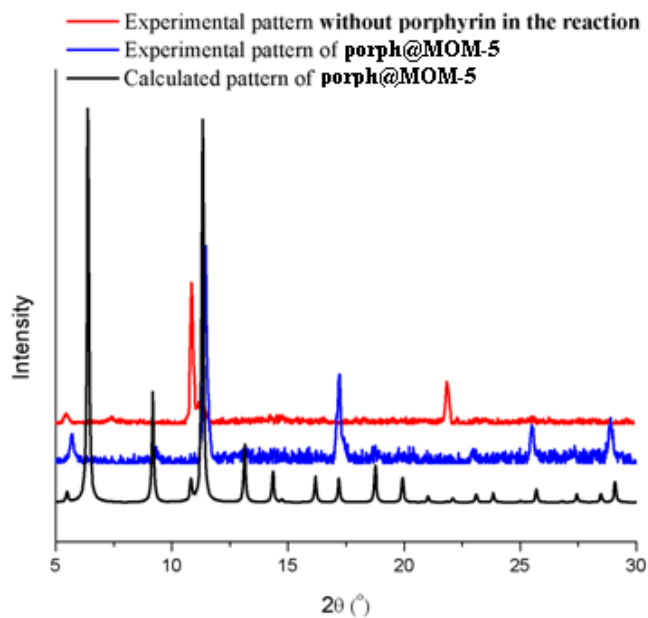

**Figure S8.** Comparison of experimental and calculated powder x-ray diffraction patterns of **porph@MOM-5** and the product that was obtained without porphyrin in the reaction.

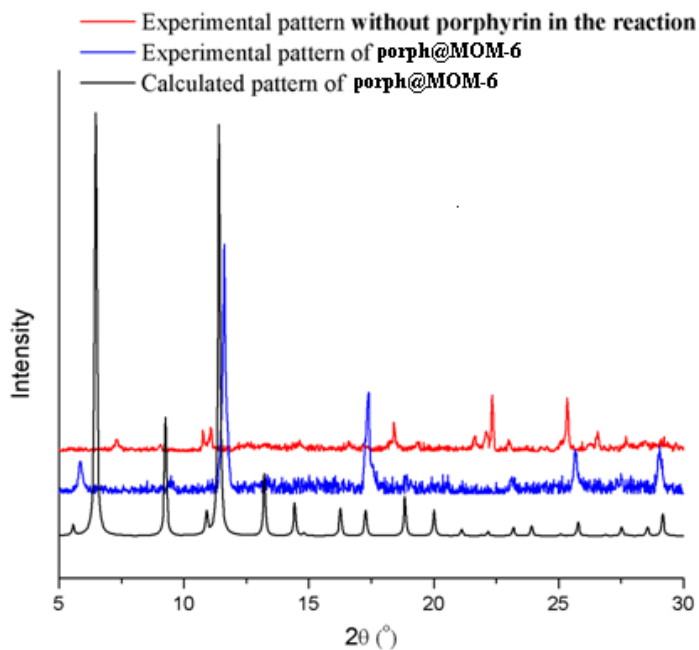

**Figure S9.** Comparison of experimental and calculated powder x-ray diffraction patterns of **porph@MOM-6** and the product that was obtained without porphyrin in the reaction.

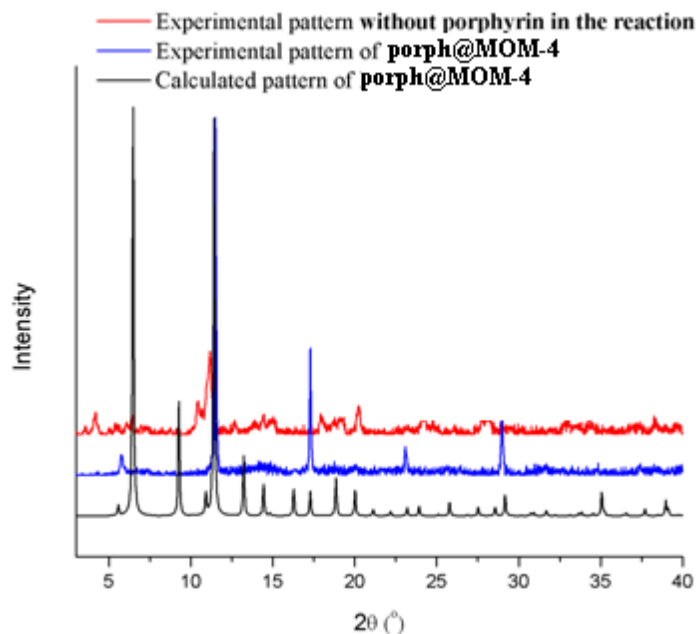

**Figure S10.** Comparison of experimental and calculated powder x-ray diffraction patterns of **porph@MOM-4** and the product that was obtained without porphyrin in the reaction.

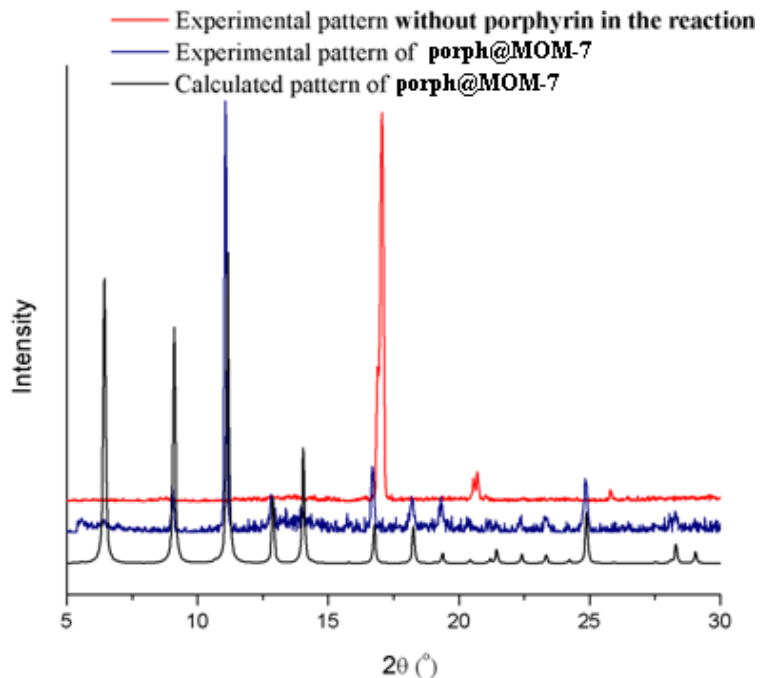

**Figure S11.** Comparison of experimental and calculated powder x-ray diffraction patterns of **porph@MOM-7** and the product that was obtained without porphyrin in the reaction.

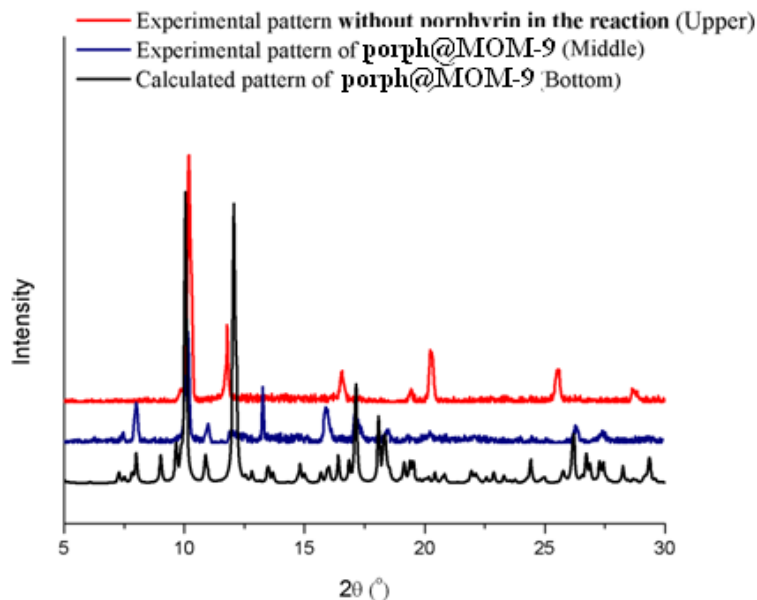

**Figure S12.** Comparison of experimental and calculated powder x-ray diffraction patterns of **porph@MOM-9** and the product that was obtained without porphyrin in the reaction.

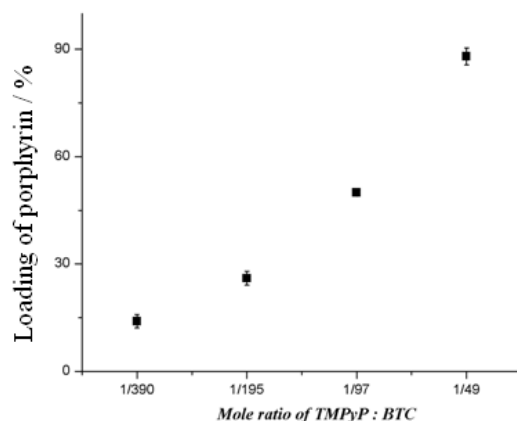

**Figure S13.** Loading of porphyrin in the middle octahemioctahedral cage varies as the amount of porphyrin added in the reaction. Experimental procedure: A serial of parallel experiments via varying the amount of TMPyP. Crystals were filtered and washed with enough methanol to remove porphines on the crystals' surface. Dissolve the crystals (~4.000 mg, weighted from the TGA machine) into water using a small amount of HCl. The loading of porphyrin was determined by UV-Vis spectrum compared with the standard aqueous solution of FeTMPyP ( $\lambda_{\text{max}} = 400 \text{ nm}$ ).

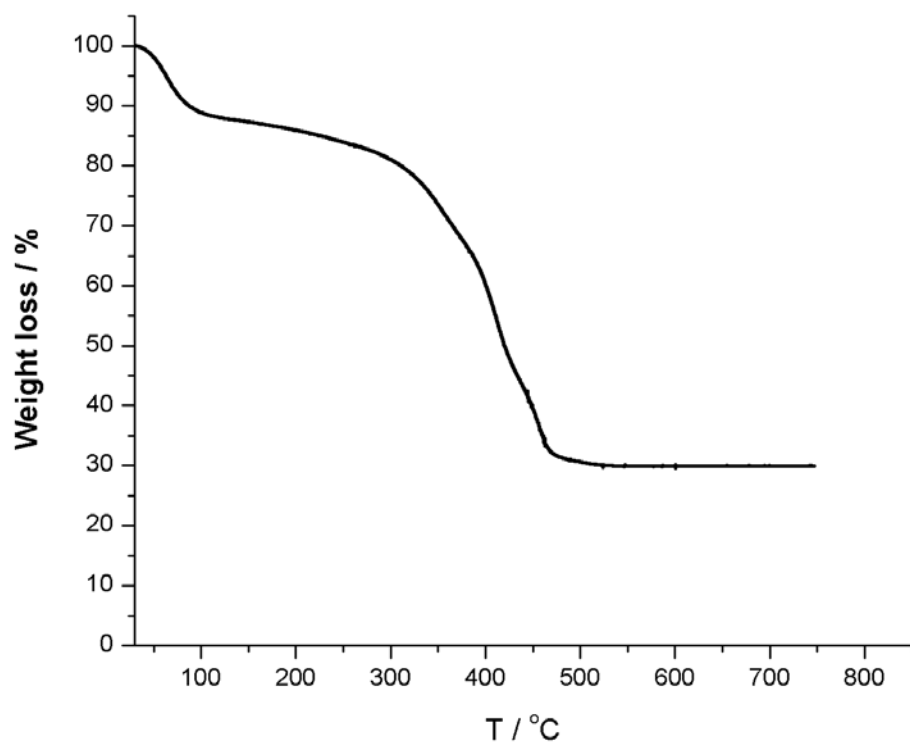

**Figure S14.** Thermogravimetric analysis of **porph@MOM-4** (Perkin Elmer STA 6000).

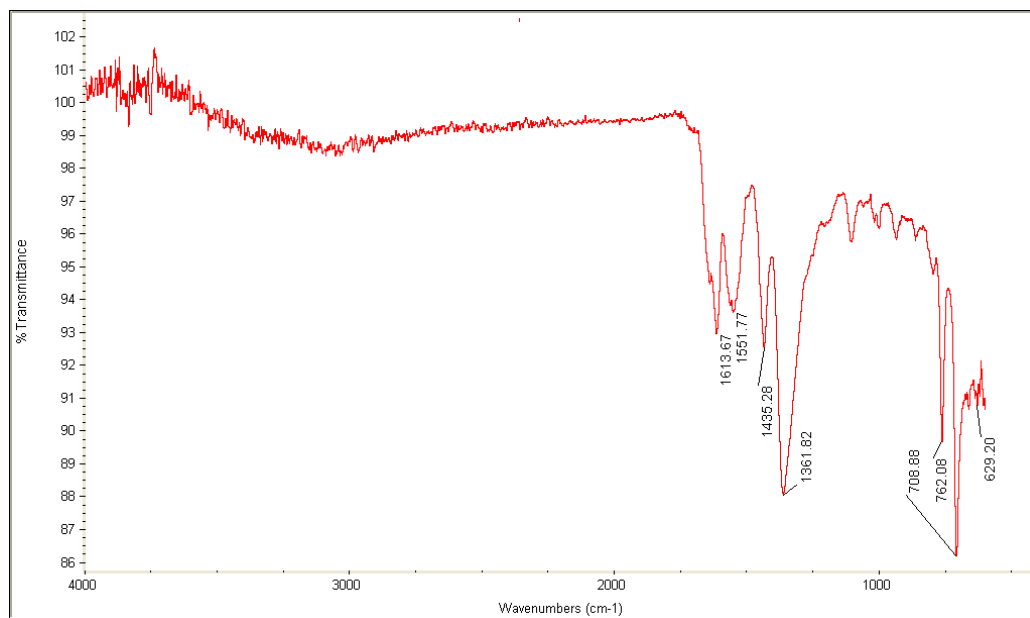

**Figure S15.** FT-IR of **porph@MOM-4** (Nicolet Avatar 320 FTIR, solid state).

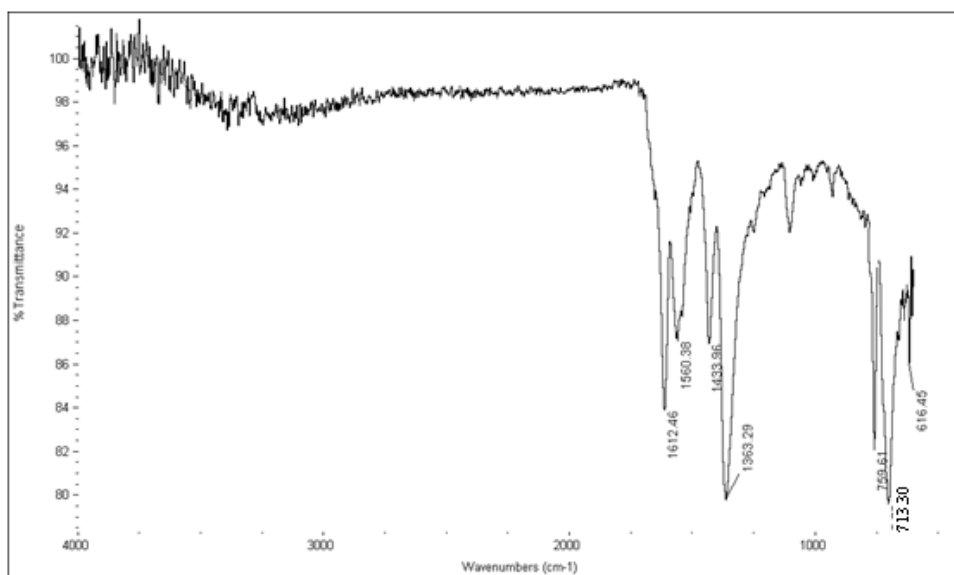

**Figure S16.** FT-IR of **porph@MOM-5** (Nicolet Avatar 320 FTIR, solid state).

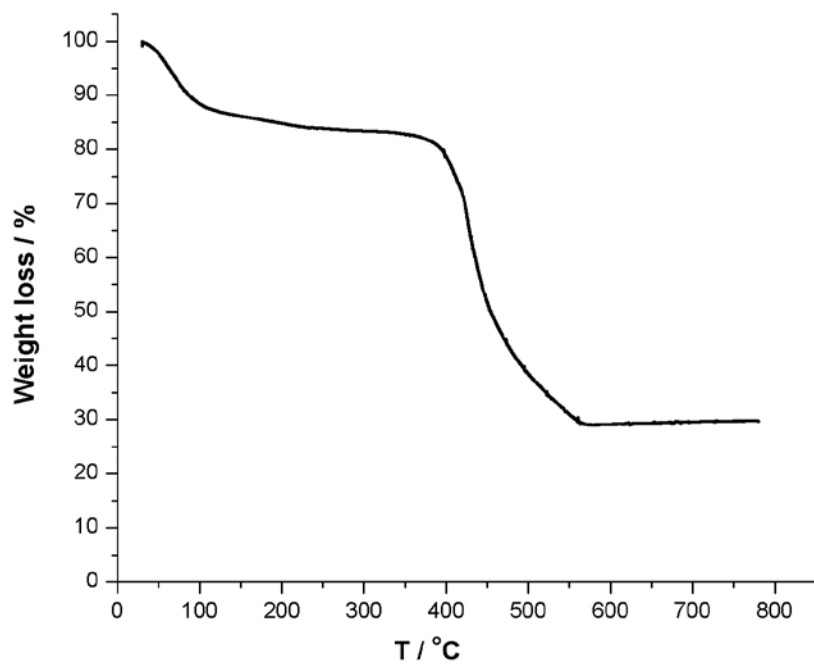

**Figure S17.** FT-IR of **porph@MOM-5** (Nicolet Avatar 320 FTIR, solid state).

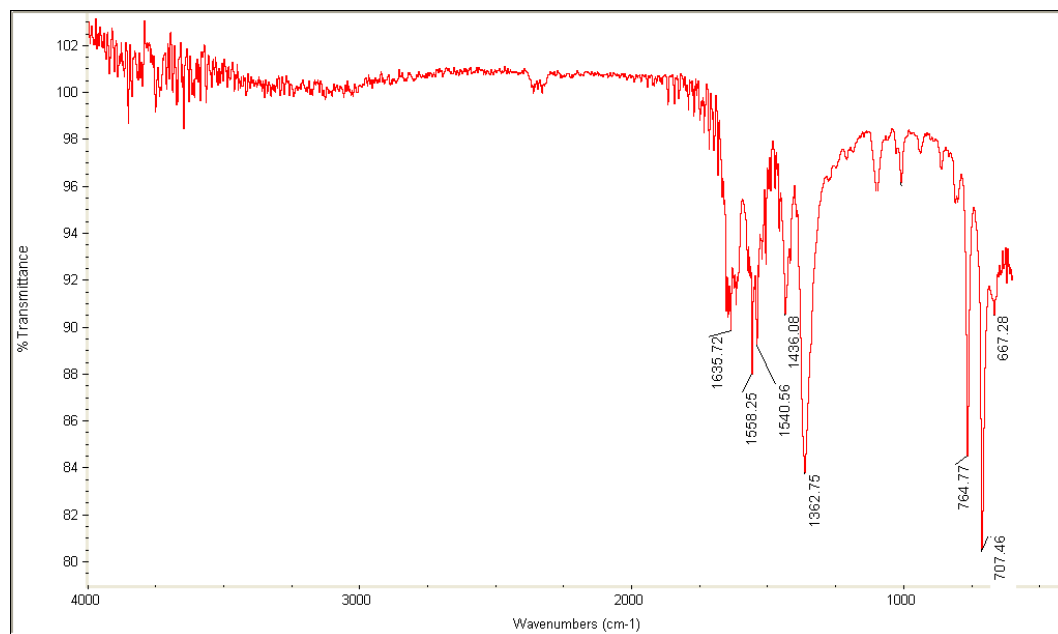

**Figure S18.** FT-IR of **porph@MOM-6** (Nicolet Avatar 320 FTIR, solid state).

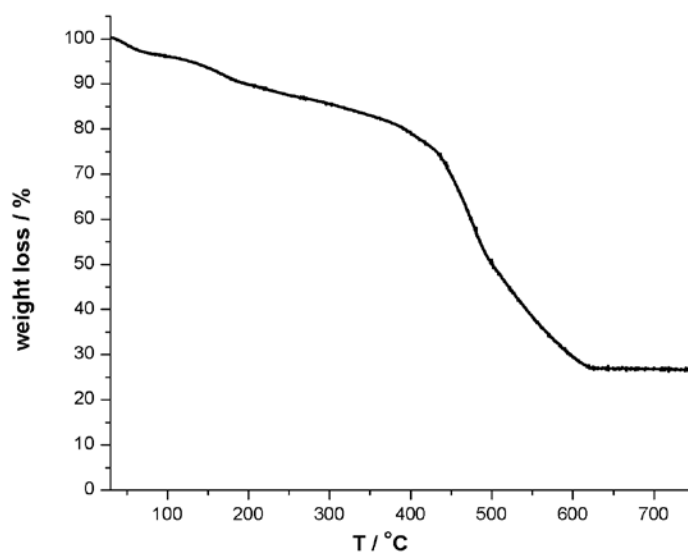

**Figure S19.** Thermogravimetric analysis of **porph@MOM-6** (Perkin Elmer STA 6000).

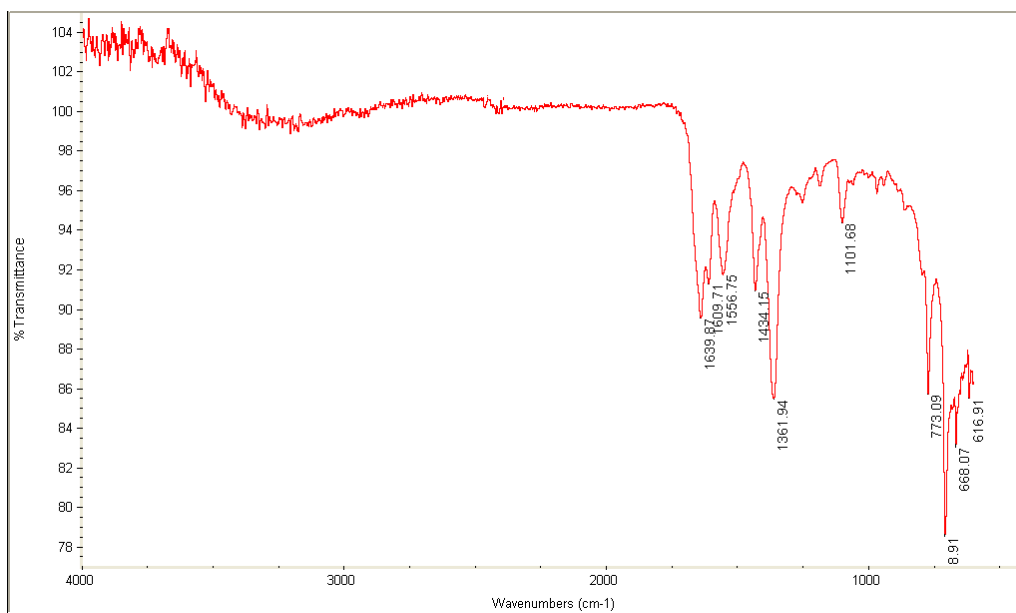

**Figure S20.** FT-IR of **porph@MOM-7** (Nicolet Avatar 320 FTIR, solid state).

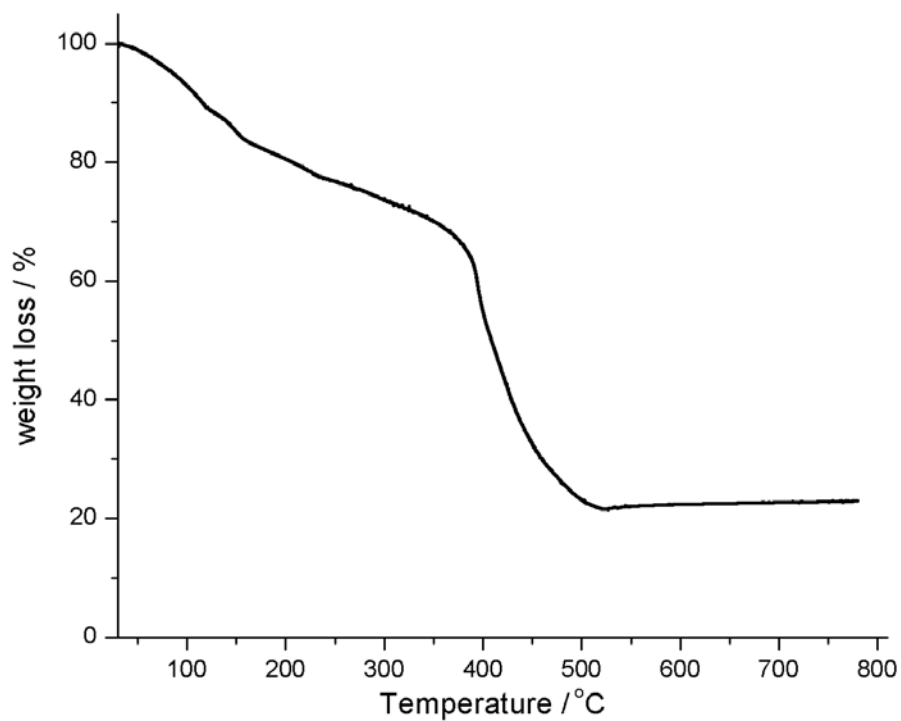

**Figure S21.** Thermogravimetric analysis of **porph@MOM-7** (Perkin Elmer STA 6000).

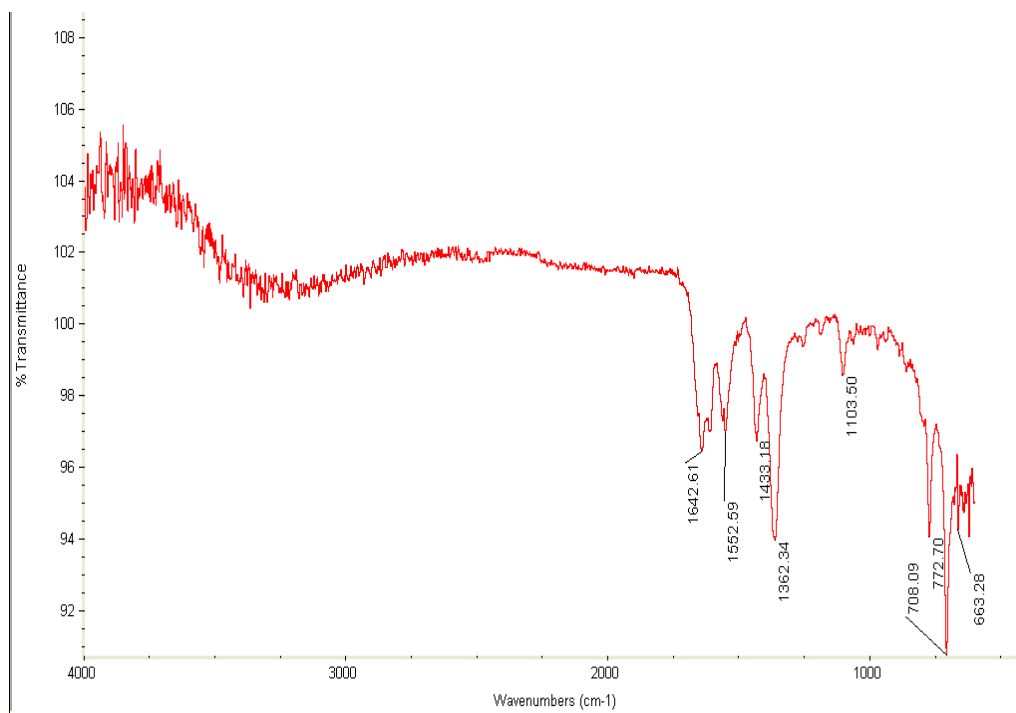

**Figure S22.** FT-IR of **porph@MOM-8** (Nicolet Avatar 320 FTIR, solid state).

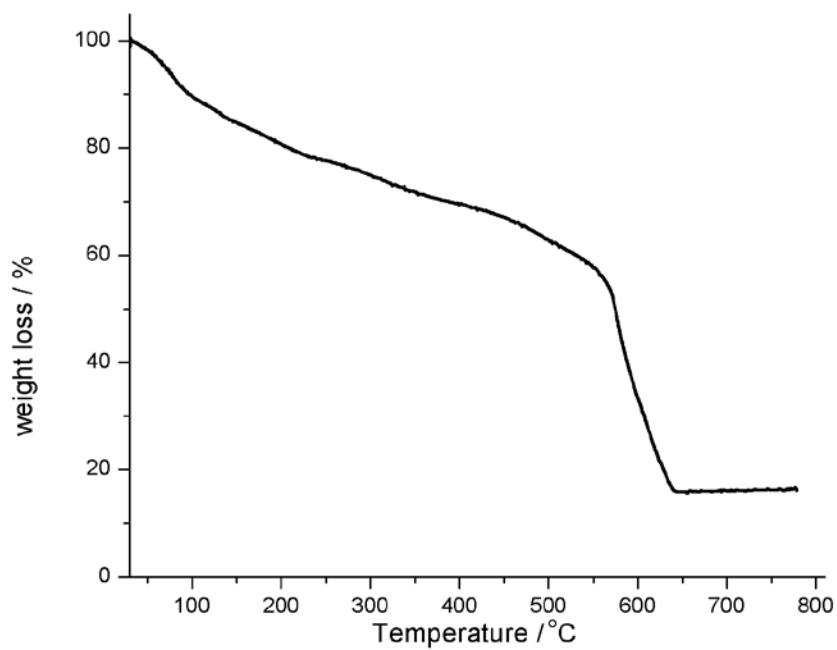

**Figure S23.** Thermogravimetric analysis of **porph@MOM-8** (Perkin Elmer STA 6000).



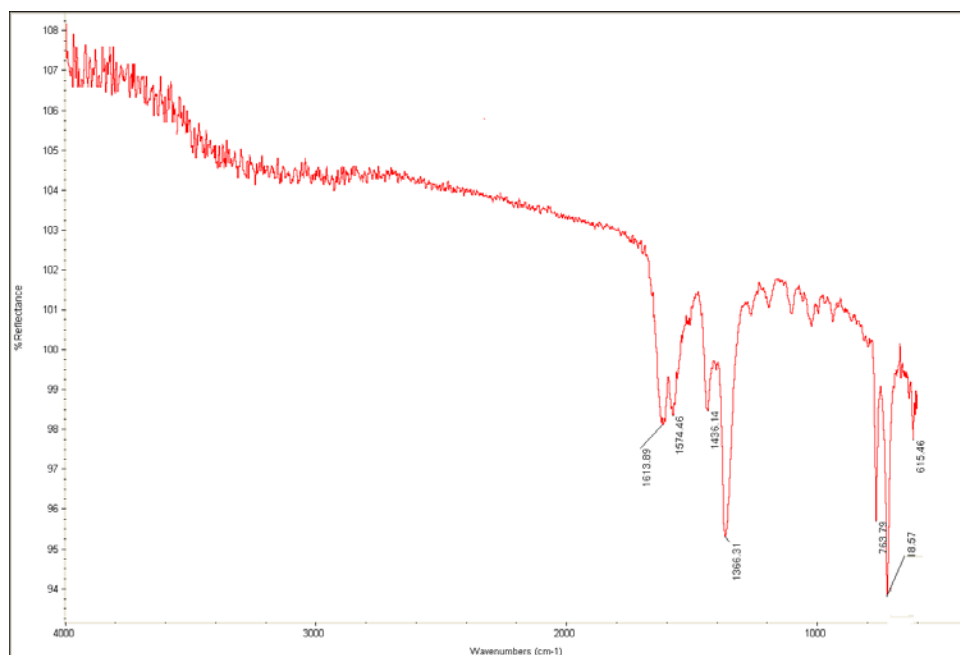

**Figure S24.** FT-IR of **porph@MOM-9** (Nicolet Avatar 320 FTIR, solid state).

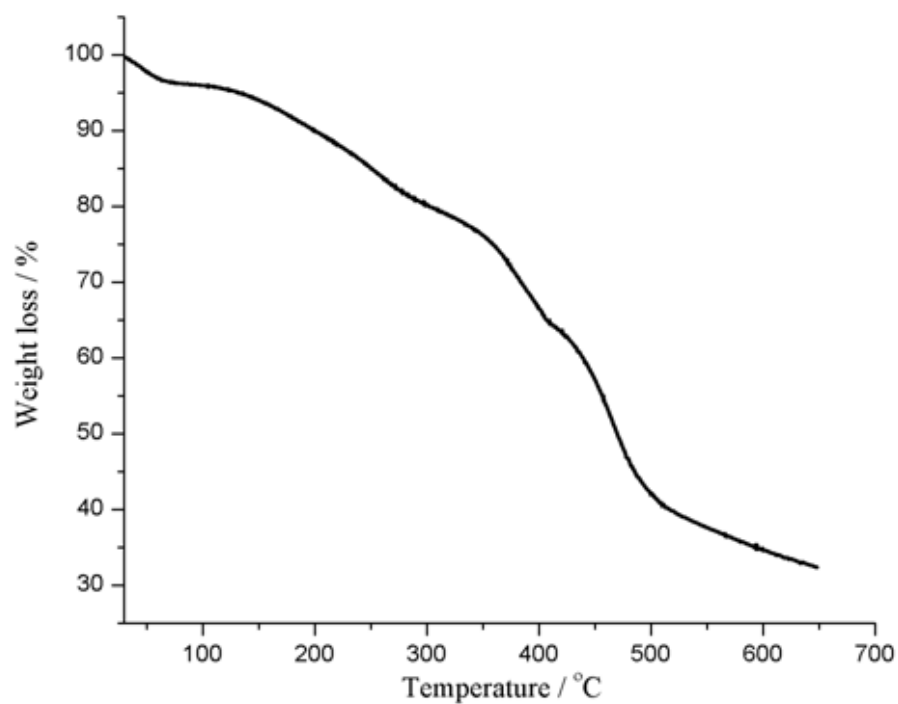

**Figure S25.** Thermogravimetric analysis of **porph@MOM-9** (Perkin Elmer STA 6000).

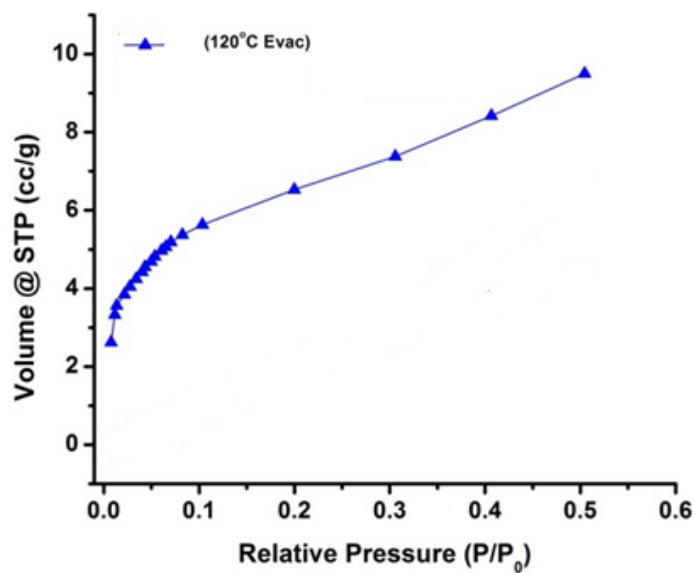

**Figure S26.** Mini N<sub>2</sub> isotherms for **porph@MOM-7**. Langmuir surface area is 126 m<sup>2</sup>/g after activation at 120°C.

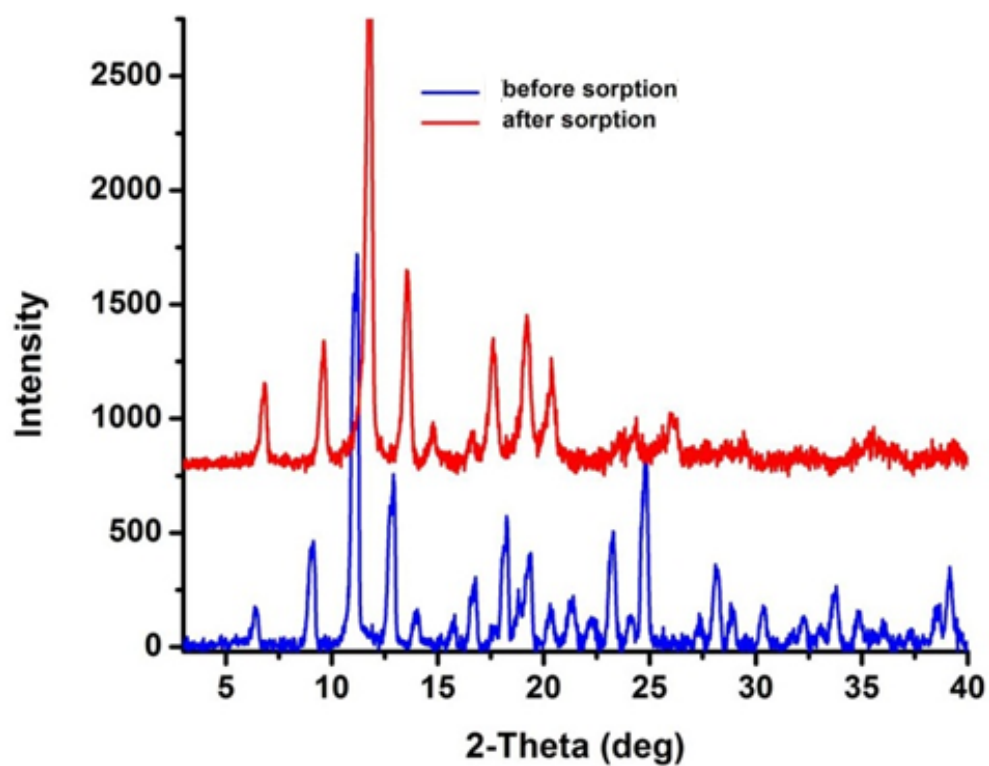

**Figure S27.** PXRD before and after sorption measurements of **porph@MOM-7**.

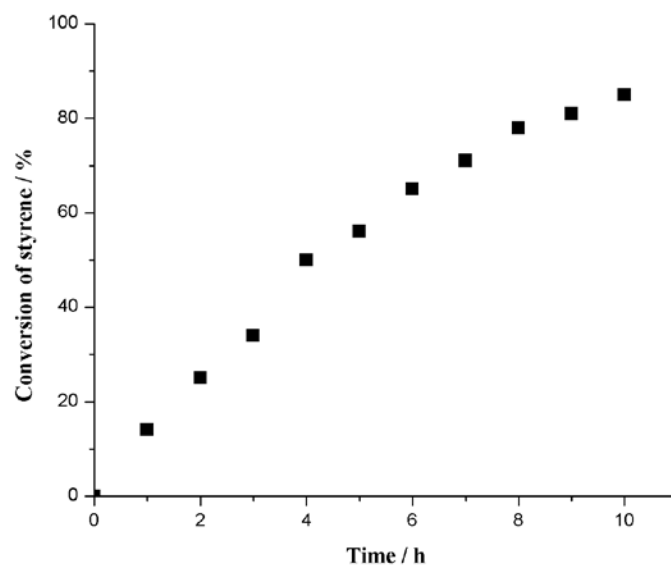

**Figure S28.** Oxidation of styrene catalyzed by **porph@MOM-4** as measured by GC-MS.

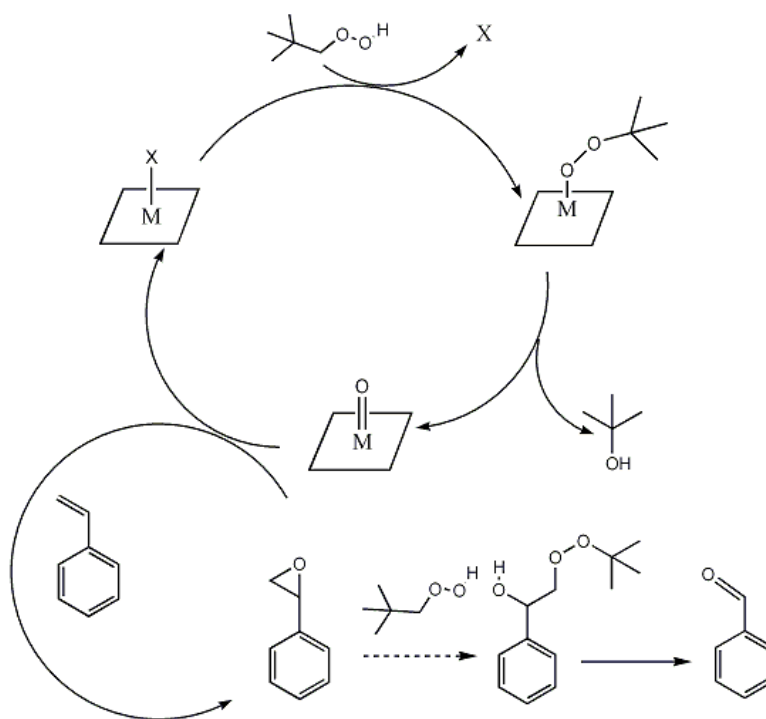

**Figure S29.** Proposed reaction mechanism for Oxidation of styrene catalyzed by **porph@MOM-4** (M = Mn, Fe, and Co).

**Table S1.** Catalysis results for **porph@MOM-4**, Fe(III)TMPyP, and control reactions (the same reaction condition without porphyrin).

| Styrene                                                                       |            |                       |                                |              |
|-------------------------------------------------------------------------------|------------|-----------------------|--------------------------------|--------------|
| Catalysts                                                                     | Conversion | TOF(h <sup>-1</sup> ) | Selectivity for major products |              |
|                                                                               |            |                       | Styrene oxide                  | Benzaldehyde |
| <b>porph@MOM-4</b> (10.0 mg)                                                  | 85%(10h)   | 269                   | 30%                            | 57%          |
| Fe(III)TMPyP(1.4mg)                                                           | 35% (10h)  | 20                    | 35%                            | 56%          |
| none                                                                          | <7% (10h)  |                       |                                |              |
| Benzoic acid and 1-phenylethanone are the major by-products in this reaction. |            |                       |                                |              |
| Trans-stilbene                                                                |            |                       |                                |              |
| Catalysts                                                                     | Conversion | TOF(h <sup>-1</sup> ) | Selectivity for major products |              |
|                                                                               |            |                       | stilbene oxide                 | Benzaldehyde |
| <b>porph@MOM-4</b> (10.0 mg)                                                  | 40% (10h)  | 126                   | 70%                            | 28%          |
| Fe(III)TMPyP(1.4mg)                                                           | 34% (10h)  | 18                    | 50%                            | 48%          |
| none                                                                          | <2% (10h)  |                       |                                |              |
| Benzoic acid is the major by-product in this reaction.                        |            |                       |                                |              |
| Triphenylethylene                                                             |            |                       |                                |              |
| Catalysts                                                                     | Conversion | TOF(h <sup>-1</sup> ) | Selectivity for major products |              |
|                                                                               |            |                       | Diphenylmeth<br>-anone         | Benzaldehyde |
| <b>porph@MOM-4</b> (10.0 mg)                                                  | 5% (10h)   | 15                    | 49%                            | 18%          |
| Fe(III)TMPyP(1.4mg)                                                           | 14% (10h)  | 8                     | 48%                            | 11%          |

|                                                                                       |           |  |
|---------------------------------------------------------------------------------------|-----------|--|
| none                                                                                  | <4% (10h) |  |
| Benzoic acid and benzoic acid butyl ester are the major by-products in this reaction. |           |  |

Substrate conversion (%) =  $\frac{\text{Substrate converted (moles)}}{\text{Substrate used (moles)}} \times 100$ , Product selectivity (%) =  $\frac{\text{Product formed (moles)}}{\text{Substrate converted (moles)}} \times 100$

| Table S2. A. Reaction with porphyrin as template                                                                                                                                                                       |                                                                     |                                                                                                                                                                                                                                                                                                                                                                                                                                                                                                                                                                                                                                                                                                                                                  |
|------------------------------------------------------------------------------------------------------------------------------------------------------------------------------------------------------------------------|---------------------------------------------------------------------|--------------------------------------------------------------------------------------------------------------------------------------------------------------------------------------------------------------------------------------------------------------------------------------------------------------------------------------------------------------------------------------------------------------------------------------------------------------------------------------------------------------------------------------------------------------------------------------------------------------------------------------------------------------------------------------------------------------------------------------------------|
| <p>FeCl<sub>2</sub></p> 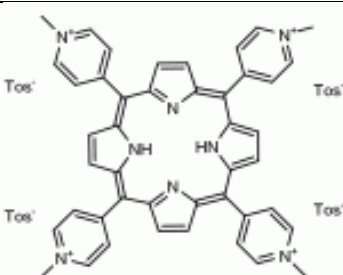 <p>TMPyP</p>  <p>BTC</p> | <p>3.0 mL DMF</p> <p>0.5 mL H<sub>2</sub>O</p> <p>85°C</p> <p>➔</p> | <p><b>porph@MOM-4</b></p> <p>[Fe<sub>12</sub>(BTC)<sub>8</sub>(S)<sub>12</sub>]Cl<sub>6</sub>·xFeTMPyPCL<sub>5</sub></p> <p>(S = H<sub>2</sub>O or DMF, x is depending upon the relative amount of porphyrin used during synthesis)</p> <p>Crystal system = Cubic</p> <p>Space group = <i>Fm-3m</i></p> <p>a = 26.5717(17) Å,</p> <p>V = 18761(2) Å<sup>3</sup></p> <p>This compound is isostructural with HKUST-1-Cu which was previously report by Williams et al.:</p> <p>Chui, S. S.-Y., Lo, S. M.-F., Charmant, J. P. H., Guy Orpen, A. &amp; Williams, I. D. A chemically functionalizable nanoporous material [Cu<sub>3</sub>(TMA)<sub>2</sub>(H<sub>2</sub>O)<sub>3</sub>]<sub>n</sub>. <i>Science</i> <b>283</b>, 1148–1150 (1999).</p> |
| B. Reaction without porphyrin                                                                                                                                                                                          |                                                                     |                                                                                                                                                                                                                                                                                                                                                                                                                                                                                                                                                                                                                                                                                                                                                  |
|                                                                                                                                                                                                                        |                                                                     | Yellow precipitate of a compound that                                                                                                                                                                                                                                                                                                                                                                                                                                                                                                                                                                                                                                                                                                            |

|                                                                                          |                                               |                                                                                     |
|------------------------------------------------------------------------------------------|-----------------------------------------------|-------------------------------------------------------------------------------------|
| $\text{FeCl}_2$                                                                          | 3.0 mL DMF<br>0.5 mL H <sub>2</sub> O<br>85°C | exhibits a different powder x-ray diffraction pattern to that of <b>porph@MOM-4</b> |
| 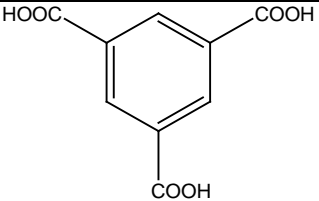<br>BTC | ➔                                             |                                                                                     |

**Table S3.** A. Reaction with porphyrin as template

|                                                                                              |                                               |                                                                                                                                                                                                                                                                                                                                   |
|----------------------------------------------------------------------------------------------|-----------------------------------------------|-----------------------------------------------------------------------------------------------------------------------------------------------------------------------------------------------------------------------------------------------------------------------------------------------------------------------------------|
| $\text{CoCl}_2$                                                                              |                                               | <b>porph@MOM-5</b><br>$[\text{Co}_{12}(\text{BTC})_8(\text{S})_{12}] \cdot x\text{CoTMPyP}\text{Cl}_4$<br>(S = solvent, x is depending upon the relative amount of porphyrin used during synthesis)<br>Crystal system = Cubic<br>Space group = <i>Fm-3m</i><br>$a = 26.4292(11) \text{ \AA}$ ,<br>$V = 18460.9(13) \text{ \AA}^3$ |
| 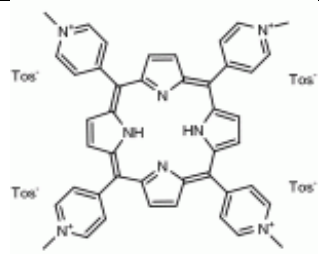<br>TMPyP | 3.0 mL DMF<br>0.5 mL H <sub>2</sub> O<br>85°C |                                                                                                                                                                                                                                                                                                                                   |
| <br>BTC   | ➔                                             | This compound is isostructural with <b>HKUST-1-Cu</b> which was previously report by Williams et al.:<br>Chui, S. S.-Y., Lo, S. M.-F., Charmant, J. P. H., Guy Orpen, A. & Williams, I. D. A chemically functionalizable nanoporous material                                                                                      |

|                                                                                                                                    |                                                                                |                                                                                                                                                                                                                                                                                                                                                                                                                                                                                                                                                          |
|------------------------------------------------------------------------------------------------------------------------------------|--------------------------------------------------------------------------------|----------------------------------------------------------------------------------------------------------------------------------------------------------------------------------------------------------------------------------------------------------------------------------------------------------------------------------------------------------------------------------------------------------------------------------------------------------------------------------------------------------------------------------------------------------|
|                                                                                                                                    |                                                                                | $[\text{Cu}_3(\text{TMA})_2(\text{H}_2\text{O})_3]_n$ . <i>Science</i> <b>283</b> , 1148–1150 (1999).                                                                                                                                                                                                                                                                                                                                                                                                                                                    |
| B. Reaction without porphyrin                                                                                                      |                                                                                |                                                                                                                                                                                                                                                                                                                                                                                                                                                                                                                                                          |
| <p><math>\text{CoCl}_2</math></p> 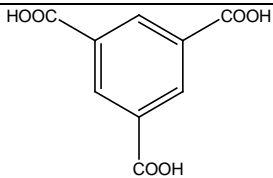 <p>BTC</p>    | <p>3.0 mL DMF<br/>0.5 mL <math>\text{H}_2\text{O}</math><br/>85°C</p> <p>→</p> | <p><math>[\text{Co}_6(\text{HCOO})(\text{BTC})_2(\text{DMF})_6]_n</math></p> <p>Crystal system = Trigonal</p> <p>Space group = <math>P-3</math></p> <p><math>a = 13.975(2) \text{ \AA}</math><br/><math>c = 8.165(1) \text{ \AA}</math>,<br/><math>V = 1380.990 \text{ \AA}^3</math></p> <p>This product was previously reported by Xu et al.: He, J., Zhang, Y., Pan, Q., Yu, J., Ding, H. &amp; Xu, R. Three metal-organic frameworks prepared from mixed solvents of DMF and HAc. <i>Microporous Mesoporous Mater.</i> <b>90</b>, 145-152 (2006).</p> |
| <b>Table S4.</b> A. Reaction with porphyrin as template                                                                            |                                                                                |                                                                                                                                                                                                                                                                                                                                                                                                                                                                                                                                                          |
| <p><math>\text{MnCl}_2</math></p>  <p>TMPyP</p> | <p>3.0 mL DMF<br/>0.5 mL <math>\text{H}_2\text{O}</math><br/>85°C</p>          | <p><b>porph@MOM-6</b></p> <p><math>[\text{Mn}_{12}(\text{BTC})_8(\text{S})_{12}] \cdot x\text{MnTMPyP}\text{Cl}_5</math></p> <p>(S = <math>\text{H}_2\text{O}</math> or DMF, x is depending upon the relative amount of porphyrin used during synthesis)</p> <p>Crystal system = Cubic</p> <p>Space group = <math>Fm-3m</math></p> <p><math>a = 26.597(2) \text{ \AA}</math>,</p>                                                                                                                                                                        |

|                                                                                                                          |                                                                                   |                                                                                                                                                                                                                                                                                                                                                                                                                |
|--------------------------------------------------------------------------------------------------------------------------|-----------------------------------------------------------------------------------|----------------------------------------------------------------------------------------------------------------------------------------------------------------------------------------------------------------------------------------------------------------------------------------------------------------------------------------------------------------------------------------------------------------|
| 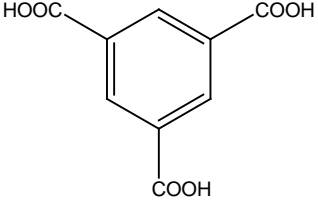 <p style="text-align: center;">BTC</p> |  | <p><math>V = 18460.9(13) \text{ \AA}^3</math></p> <p>This compound is isostructural with HKUST-1-Cu which was previously report by Williams et al.: Chui, S. S.-Y., Lo, S. M.-F., Charmant, J. P. H., Guy Orpen, A. &amp; Williams, I. D. A chemically functionalizable nanoporous material <math>[\text{Cu}_3(\text{TMA})_2(\text{H}_2\text{O})_3]_n</math>. <i>Science</i> <b>283</b>, 1148–1150 (1999).</p> |
|--------------------------------------------------------------------------------------------------------------------------|-----------------------------------------------------------------------------------|----------------------------------------------------------------------------------------------------------------------------------------------------------------------------------------------------------------------------------------------------------------------------------------------------------------------------------------------------------------------------------------------------------------|

**B. Reaction without porphyrin**

|                                                                                                                                                  |                                                                                                                                                                 |                                                                                                                                                                                                                                                                                                                                                                                                                                                                                                                           |
|--------------------------------------------------------------------------------------------------------------------------------------------------|-----------------------------------------------------------------------------------------------------------------------------------------------------------------|---------------------------------------------------------------------------------------------------------------------------------------------------------------------------------------------------------------------------------------------------------------------------------------------------------------------------------------------------------------------------------------------------------------------------------------------------------------------------------------------------------------------------|
| <p style="text-align: center;"><math>\text{MnCl}_2</math></p> 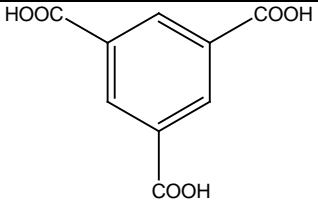 | <p>3.0 mL DMF</p> <p>0.5 mL <math>\text{H}_2\text{O}</math></p> <p>85°C</p>  | <p><b><math>[\text{Mn}_6(\text{HCOO})(\text{BTC})_2(\text{DMF})_6]_n</math></b></p> <p>Crystal system = Trigonal</p> <p>Space group = <math>P-3</math></p> <p><math>a = 13.90 \text{ \AA}</math></p> <p><math>c = 8.11 \text{ \AA}</math>,</p> <p><math>V = 1434.454 \text{ \AA}^3</math></p> <p>This product was previously reported by Kitagawa et al.: Chen, J., Ohba, M. &amp; Kitagawa, S. Two New Coordination Polymers Based on Hexanuclear Metal Cluster Cores. <i>Chem. Lett.</i> <b>35</b>, 526-527 (2006).</p> |
|--------------------------------------------------------------------------------------------------------------------------------------------------|-----------------------------------------------------------------------------------------------------------------------------------------------------------------|---------------------------------------------------------------------------------------------------------------------------------------------------------------------------------------------------------------------------------------------------------------------------------------------------------------------------------------------------------------------------------------------------------------------------------------------------------------------------------------------------------------------------|

**Table S5.A.** Reaction with porphyrin as template

|                                             |  |                           |
|---------------------------------------------|--|---------------------------|
| <p><math>\text{Ni}(\text{OAc})_2</math></p> |  | <p><b>porph@MOM-7</b></p> |
|---------------------------------------------|--|---------------------------|



|                                                                                                                             |                                                                     |                                                                                                                                                                                                                                                                                                                                                                                     |
|-----------------------------------------------------------------------------------------------------------------------------|---------------------------------------------------------------------|-------------------------------------------------------------------------------------------------------------------------------------------------------------------------------------------------------------------------------------------------------------------------------------------------------------------------------------------------------------------------------------|
| 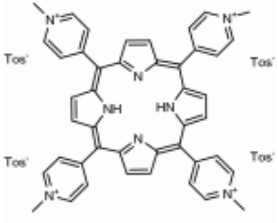 <p>TMPyP</p>                              | <p>2.0 mL DMF</p> <p>0.4 mL H<sub>2</sub>O</p> <p>85°C</p> <p>➔</p> | <p><math>[\text{Ni}_{10}(\text{BTC})_8(\text{S})_{24}] \cdot x\text{NiTMPyP} \cdot (\text{H}_3\text{O})_{(4-4x)}</math> (S = solvent, x is depending upon the relative amount of porphyrin used during synthesis)</p> <p>Crystal system = Cubic</p> <p>Space group = <i>Fm-3m</i></p> <p><math>a = 27.478(2) \text{ \AA}</math>,</p> <p><math>V = 20747(3) \text{ \AA}^3</math></p> |
|  <p>BTC</p>                                |                                                                     |                                                                                                                                                                                                                                                                                                                                                                                     |
| B. Reaction without porphyrin                                                                                               |                                                                     |                                                                                                                                                                                                                                                                                                                                                                                     |
| <p>Ni(OAC)<sub>2</sub></p>               | <p>2.0 mL DMF</p> <p>0.4 mL H<sub>2</sub>O</p> <p>85°C</p> <p>➔</p> | <p>Prismatic light green crystals of a compound that exhibits a different powder x-ray diffraction pattern to that of <b>porph@MOM-7</b> were obtained.</p>                                                                                                                                                                                                                         |
| Table S6. A. Reaction with porphyrin as template                                                                            |                                                                     |                                                                                                                                                                                                                                                                                                                                                                                     |
| <p>Mg(OAC)<sub>2</sub></p>  <p>TMPyP</p> | <p>2.0 mL DMF</p> <p>0.4 mL H<sub>2</sub>O</p> <p>85°C</p>          | <p><b>porph@MOM-8</b></p> <p><math>[\text{Ni}_{10}(\text{BTC})_8(\text{S})_{24}] \cdot x\text{NiTMPyP} \cdot (\text{H}_3\text{O})_{(4-4x)}</math> (S = H<sub>2</sub>O or DMF, x is depending upon the relative amount of porphyrin used during synthesis)</p>                                                                                                                       |

|                                                                                                                                        |                                                               |                                                                                                                                                                                                                                          |
|----------------------------------------------------------------------------------------------------------------------------------------|---------------------------------------------------------------|------------------------------------------------------------------------------------------------------------------------------------------------------------------------------------------------------------------------------------------|
| 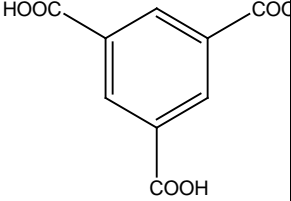 <p>BTC</p>                                           | <p>→</p>                                                      |                                                                                                                                                                                                                                          |
| B. Reaction without porphyrin                                                                                                          |                                                               |                                                                                                                                                                                                                                          |
|  <p>Mg(OAc)<sub>2</sub></p>                           | <p>2.0 mL DMF<br/>0.4 mL H<sub>2</sub>O<br/>85°C</p> <p>→</p> | <p>Prismatic colorless crystals of a compound that exhibits a different powder x-ray diffraction pattern to that of <b>porph@MOM-8</b> were obtained.</p>                                                                                |
| Table S7.A. Reaction with porphyrin as template                                                                                        |                                                               |                                                                                                                                                                                                                                          |
| <p>Zn(NO<sub>3</sub>)<sub>2</sub></p>  <p>TMPyP</p> | <p>3.0 mL<br/>DMA<br/>0.5 mL H<sub>2</sub>O<br/>85°C</p>      | <p><b>porph@MOM-9</b><br/>[Zn<sub>18</sub>(OH)<sub>4</sub>(BTC)<sub>12</sub>(S)<sub>15</sub>]·xZnTMPyP·H<sub>3</sub>O<sub>(4-4x)</sub><br/>(S = solvent, x is depending upon the relative amount of porphyrin used during synthesis)</p> |

|                                                                                                                                |                                                                     |                                                                                                                                                                                                                                                                      |
|--------------------------------------------------------------------------------------------------------------------------------|---------------------------------------------------------------------|----------------------------------------------------------------------------------------------------------------------------------------------------------------------------------------------------------------------------------------------------------------------|
| 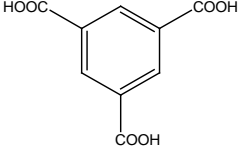 <p>BTC</p>                                   | <p>➔</p>                                                            | <p>Crystal system = Orthorhombic</p> <p>Space group = <i>Cmmm</i></p> <p><math>a = 19.653(3) \text{ \AA}</math>; <math>b = 44.127(6) \text{ \AA}</math></p> <p><math>c = 14.543(2) \text{ \AA}</math>; <math>V = 12612(3) \text{ \AA}^3</math></p>                   |
| <p>B. Reaction without porphyrin</p>                                                                                           |                                                                     |                                                                                                                                                                                                                                                                      |
| <p><math>\text{Zn}(\text{NO}_3)_2</math></p>  | <p>3.0 mL DMA</p> <p>0.5 mL H<sub>2</sub>O</p> <p>85°C</p> <p>➔</p> | <p>Crystal system = Cubic</p> <p><math>a = 15.350(5) \text{ \AA}</math>; <math>V = 3616.9(18) \text{ \AA}^3</math></p> <p>Triangular shaped colorless crystals of a compound that exhibits a different PXRD pattern to that of <b>porph@MOM-9</b> were obtained.</p> |
